# Supplementary material for: On community structure validation in real networks
Source: Springer Nature journal article supplement (doi:10.1007/s00180-021-01156-6), 2021-10-04
Supplement: 180_2021_1156_MOESM1_ESM.pdf [file 180_2021_1156_MOESM1_ESM.pdf]

Supplementary material for the article  
“On community structure validation in real networks”

Mirko Signorelli<sup>1</sup> and Luisa Cutillo<sup>2</sup>

<sup>1</sup>*Mathematical Institute, Leiden University (NL)*

<sup>2</sup>*School of Mathematics, University of Leeds (UK)*

## **Supplementary Figures**

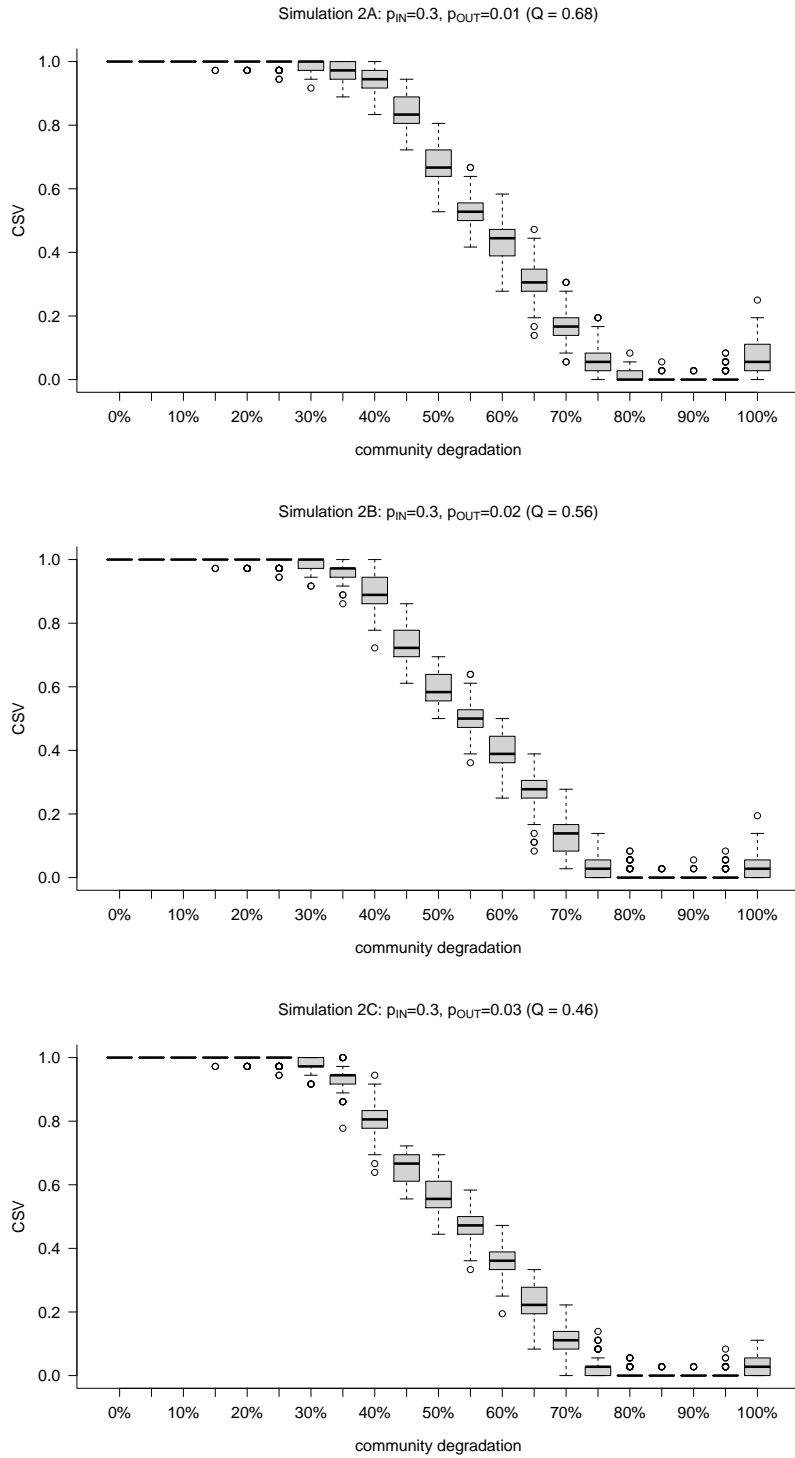

Figure 1: Distribution of CSV for different values of community degradation in Simulations 2A-2C.  $p_{IN}$  denotes the interaction probabilities within blocks ( $\theta_{rr}$ ),  $p_{OUT}$  those between blocks ( $\theta_{rr}, r \neq s$ ) and  $Q$  the modularity of the graph.

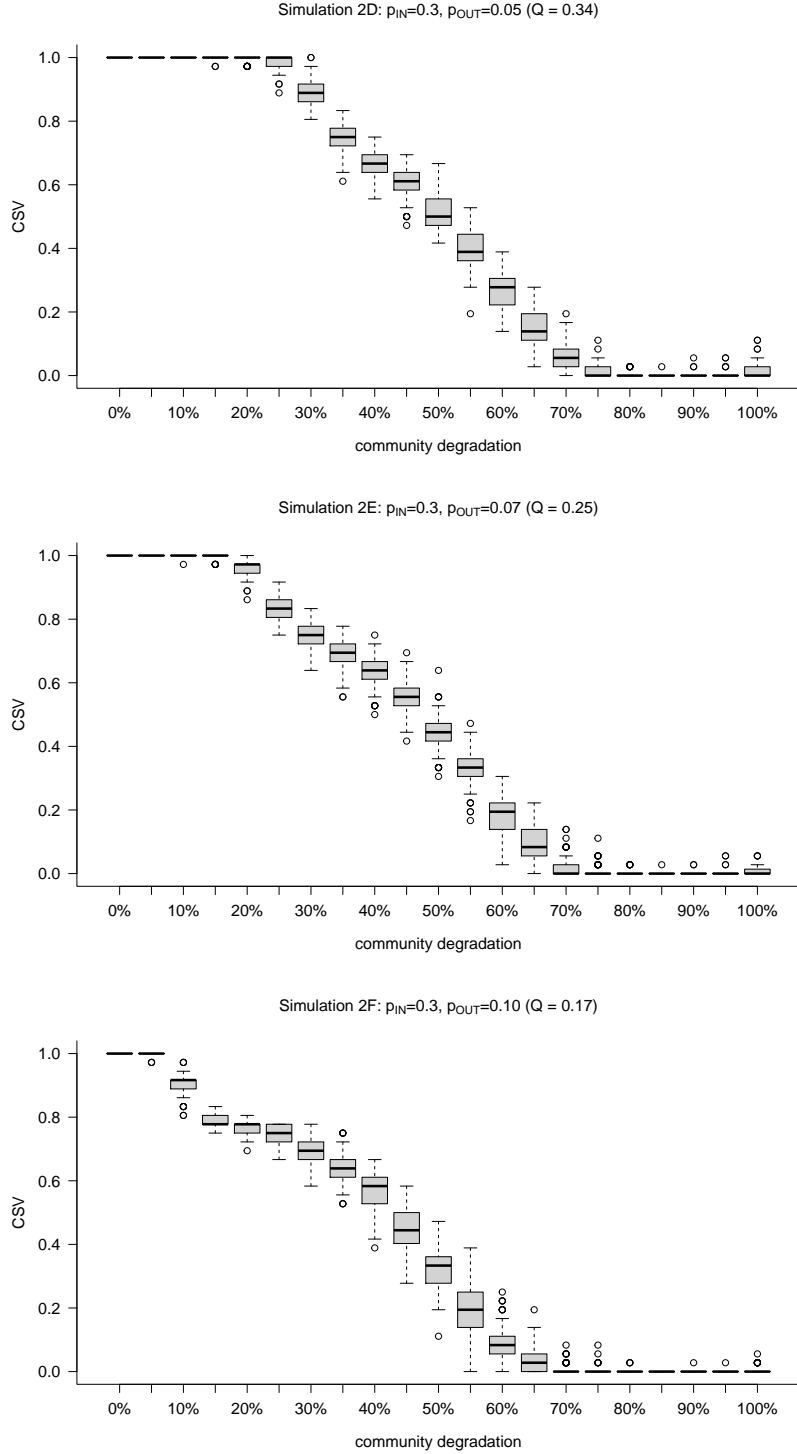

Figure 2: Distribution of CSV for different values of community degradation in Simulations 2D-2F.  $p_{IN}$  denotes the interaction probabilities within blocks ( $\theta_{rr}$ ),  $p_{OUT}$  those between blocks ( $\theta_{rr}, r \neq s$ ) and  $Q$  the modularity of the graph.

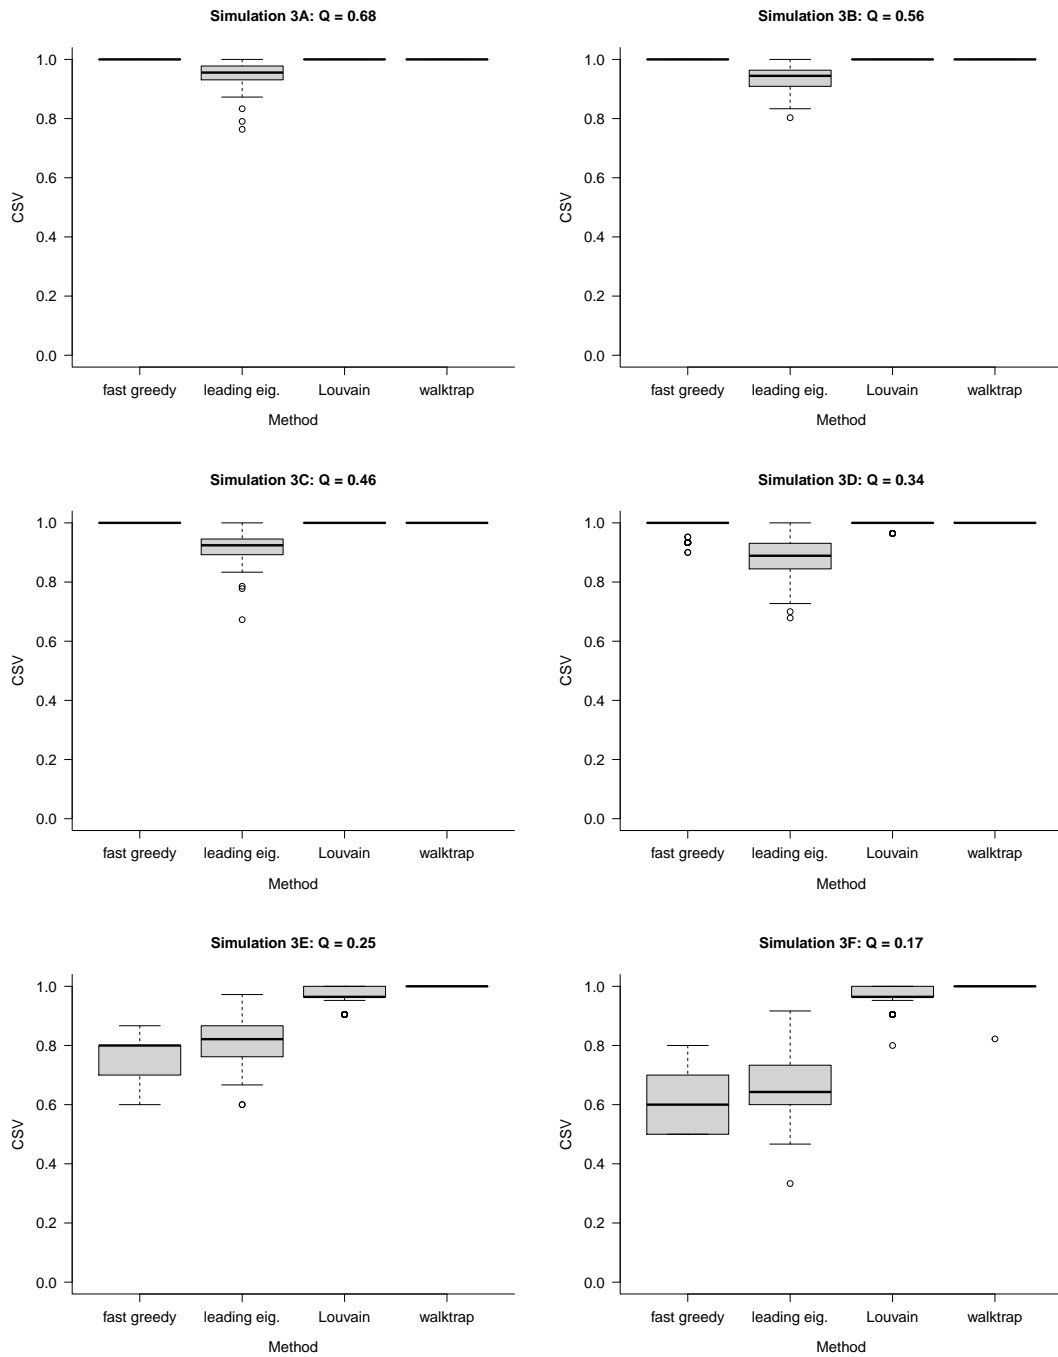

Figure 3: Comparison of four network clustering algorithms at different levels of modularity ( $Q$ ).

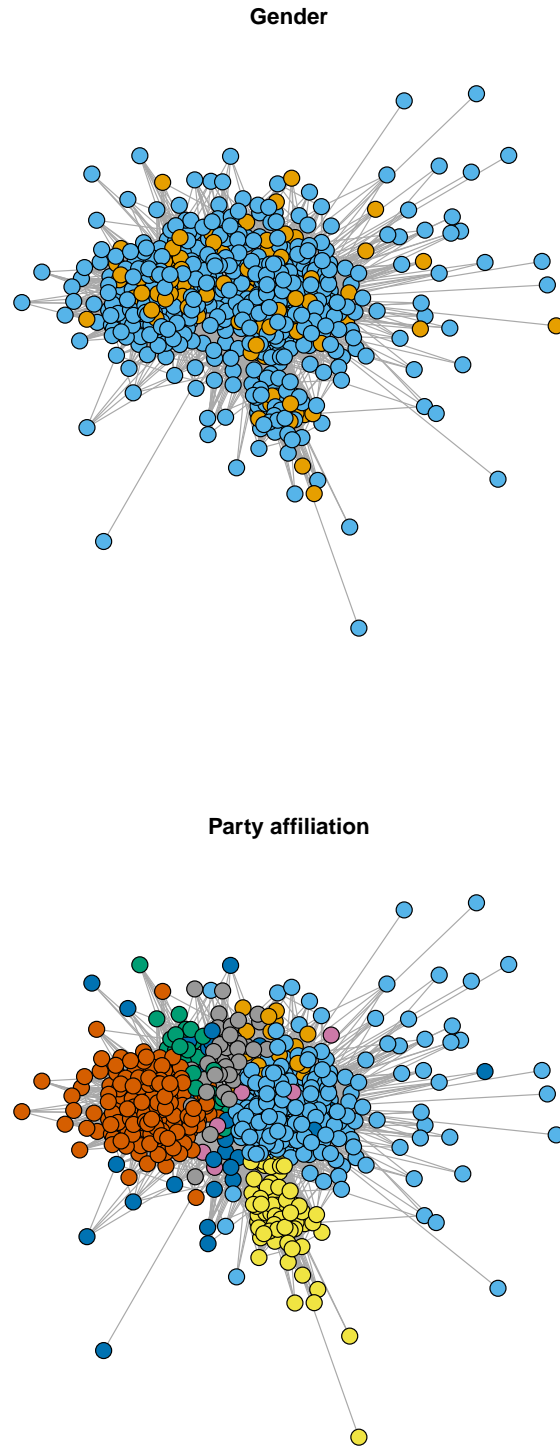

Figure 4: Bill cosponsorship network between Deputies in Italian Parliament during the XVI legislature (2008-2013) and metadata: gender (orange = female, lightblue = male) and party membership (colors correspond to the 8 parliamentary groups represented in the Chamber).
